# Supplementary material for: Implementation of peer support for people with severe mental health conditions in high-, middle- and low-income-countries: a theory of change approach
Source: PubMed Central journal article supplement (PMC11027518; doi:10.1186/s12913-024-10990-5), 2024-04-18
Supplement: 12913_2024_10990_MOESM2_ESM.pdf [file 12913_2024_10990_MOESM2_ESM.pdf]

**Supplementary file 2**

File format: .pdf

Title of data: Site-specific ToC maps

Description: Supplementary file 2 contains the drafts of the site-specific Theory of Change maps of all UPSIDES study sites and a table with an overview of commonalities and differences between all drafts.

**Table 1 in Supplementary File 2. Commonalities and differences in drafts of ToC maps.**

| Commonalities                                                                            | Differences and unique elements in each study site                                                           |                                                                                                                          |                                                                                   |                                                                        |                                                                           |                                                  |
|------------------------------------------------------------------------------------------|--------------------------------------------------------------------------------------------------------------|--------------------------------------------------------------------------------------------------------------------------|-----------------------------------------------------------------------------------|------------------------------------------------------------------------|---------------------------------------------------------------------------|--------------------------------------------------|
|                                                                                          | UULM                                                                                                         | UKE                                                                                                                      | BU                                                                                | DS                                                                     | BGU                                                                       | PU                                               |
| Collaboration and networking in all drafts                                               | Mainly within institution and with other mental health providers                                             | Mainly with other mental health providers                                                                                | Within institution and with the community                                         | Collaboration with mental health providers and with community          | Mainly within and with other mental health providers                      | Focus on collaboration with the community        |
| Training and stakeholder engagement as interventions in all drafts                       | Other interventions mainly pre- and during trial                                                             | High number of post-trial interventions                                                                                  | Several other pre-, during and post-trial interventions                           | Other interventions only pre- and during trial                         | Several other pre-, during and post-trial interventions                   | No other interventions                           |
| Finances, employment or reimbursement in 5 of 6 drafts                                   | Mentions financial compensation of PSWs, focus on role and integration of PSWs as staff members              | Mentions budget and PSWs as staff members                                                                                | Mentions reimbursement of PSWs and income-generating activities                   | No mention of finances or employment                                   | Mentions employment and professionalisation of PSWs                       | Mentions financial empowerment of PSWs           |
| Organisational readiness in 5 of 6 drafts                                                | Mentioned in two outcomes: 1) staff members ready for PS and 2) overcome staff members' timidity and reserve | Described as social inclusion on an institutional level                                                                  | Described as preparedness of staff to create an enabling environment for PSW      | Described as awareness of staff before integration of PSWs in hospital | Organisational Readiness explicitly mentioned as outcome                  | No mention of organisational readiness           |
| Different phases of the project (pre-, during and post-trial) mentioned in 5 of 6 drafts | Focus on elements pre- and during trial, mentions scale-up after trial briefly                               | No pre-trial outcomes, few pre-trial interventions, focus on sustainability post-trial                                   | All phases of the project, long-term integration in services plays prominent role | Focus on activities pre-trial and during the trial                     | All phases of the project, sustainability post-trial explicitly mentioned | No differentiation between phases                |
| Causal links between ToC elements in 4 of 6 drafts                                       | No causal links                                                                                              | Causal links indicated in draft                                                                                          | Causal links indicated in draft                                                   | Causal links indicated in draft                                        | Causal links indicated in draft                                           | No causal links                                  |
| Final impact after ceiling of accountability defined in 3 of 6 drafts                    | Peer support successfully implemented                                                                        | Enhance the social inclusion of people with mental health problems and decrease stigmatization of mental health problems | PSW is integrated into routine mental health care in Uganda & other countries     | Final impact "Recovery" not further elaborated                         | No final impact statement                                                 | No final impact statement                        |
| Assumptions, indicators and rationales described in 5 of 6 drafts                        | Assumptions, indicators and rationales described                                                             | Assumptions, indicators and rationales described                                                                         | None available                                                                    | Assumptions, indicators and rationales described                       | Rationales described                                                      | Assumptions, indicators and rationales described |

Note. PSW = peer support worker; PS = peer support; UULM = Ulm, Germany; UKE = Hamburg, Germany; BU = Kampala, Uganda; DS = Dar es Salaam, Tanzania; BGU = Be'er Sheva, Israel; PU = Pune, India.

PS successfully implemented

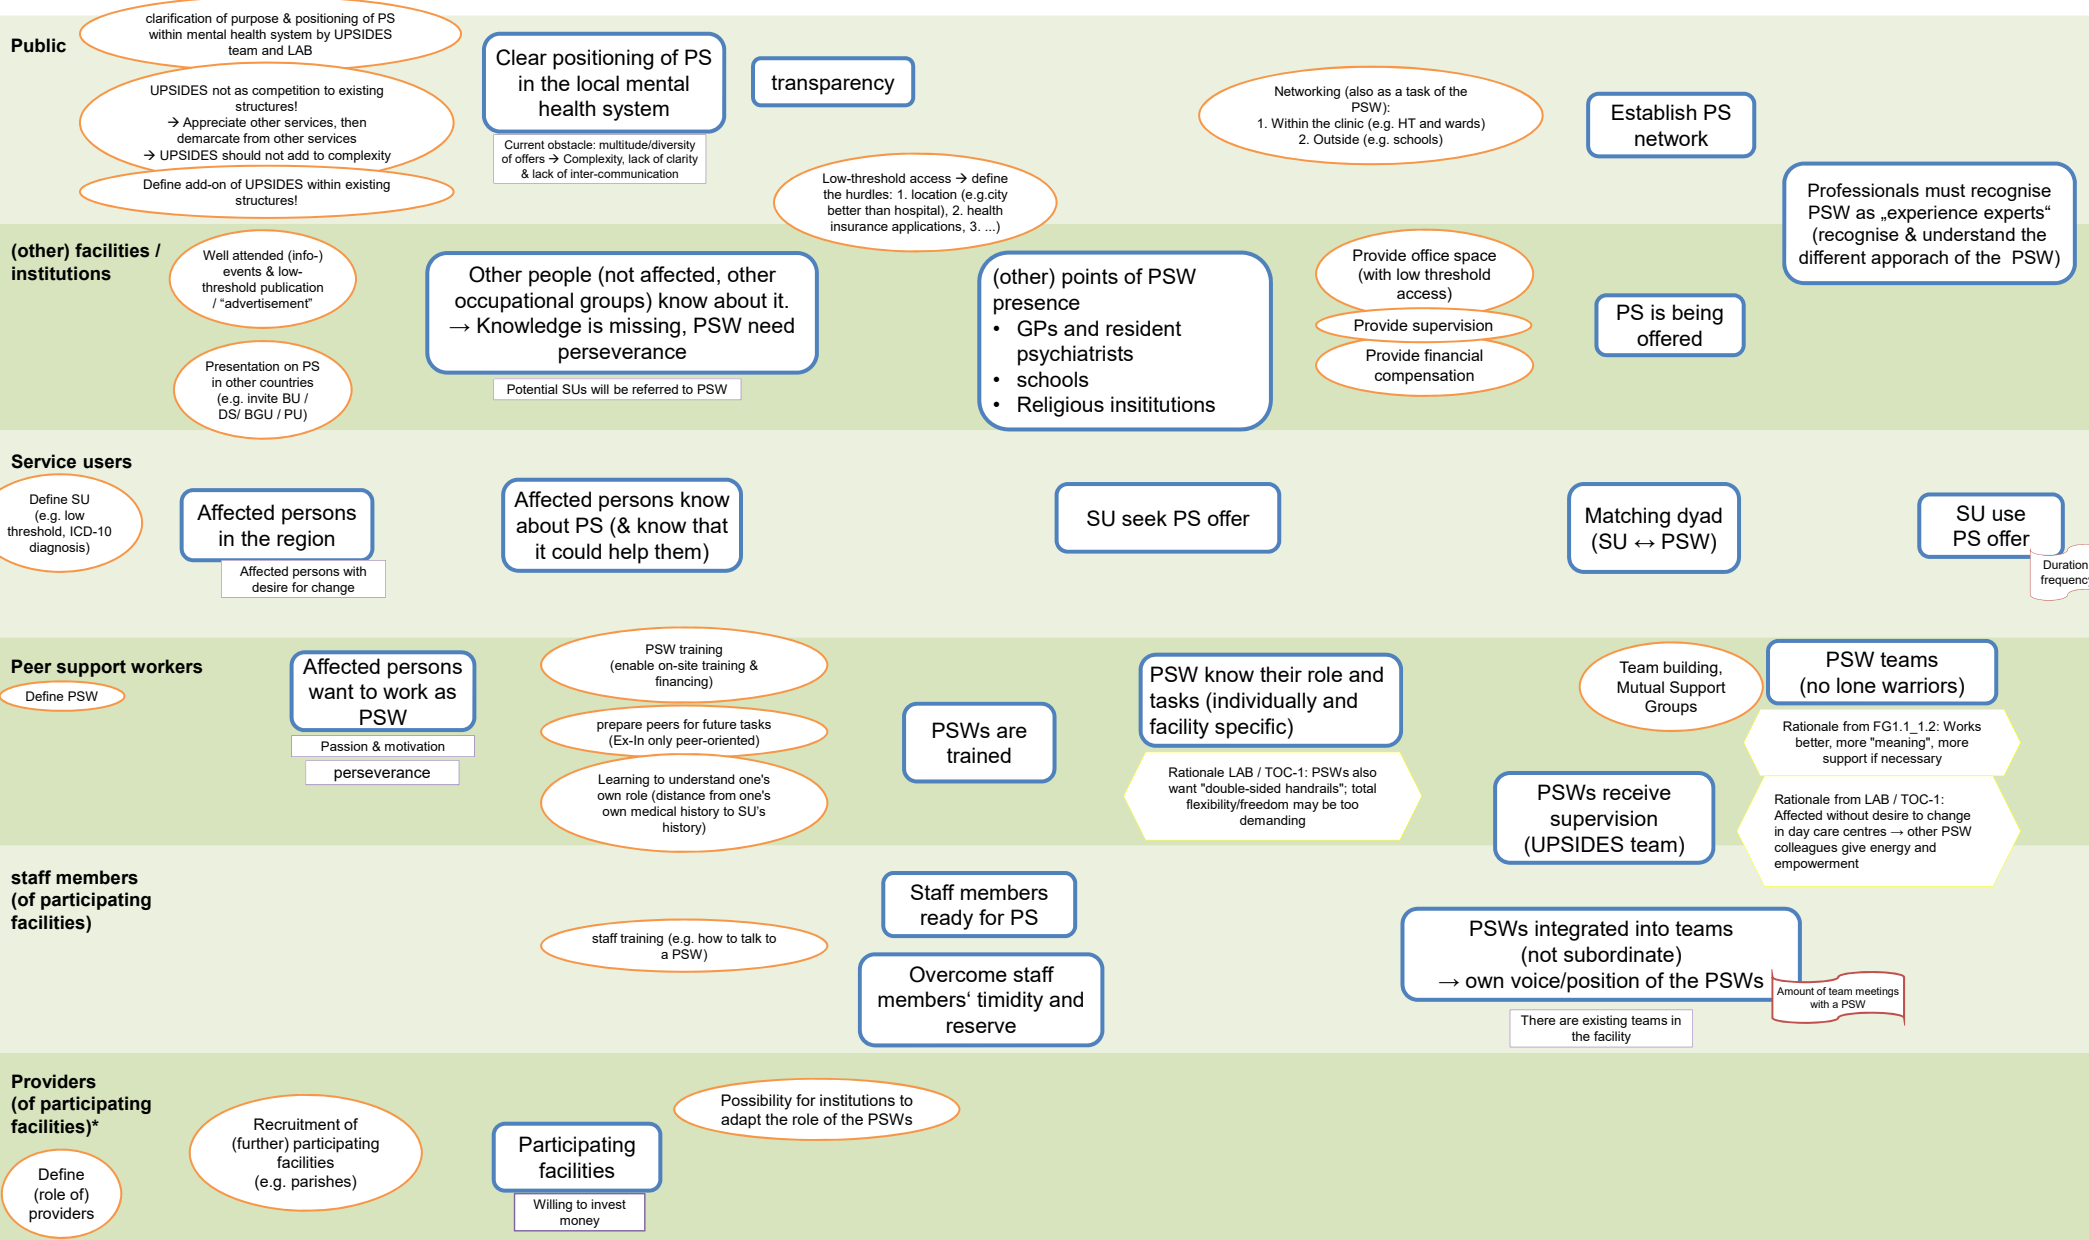

\* Parishes and other religious communities, social psychiatric services, clinics and hospitals, charitable services, general practitioners, resident psychiatrists, municipal counselling agencies, schools

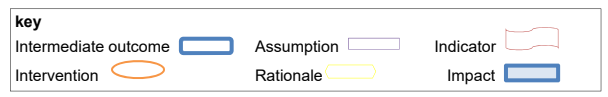

**Abbreviations:**  
 PSW – Peer Support Worker  
 PS – Peer Support  
 SU – Service User  
 LAB – Local Advisory Board  
 HT – Home Treatment

## ACCESSIBILITY OF THE UPSIDES PEER SUPPORT:

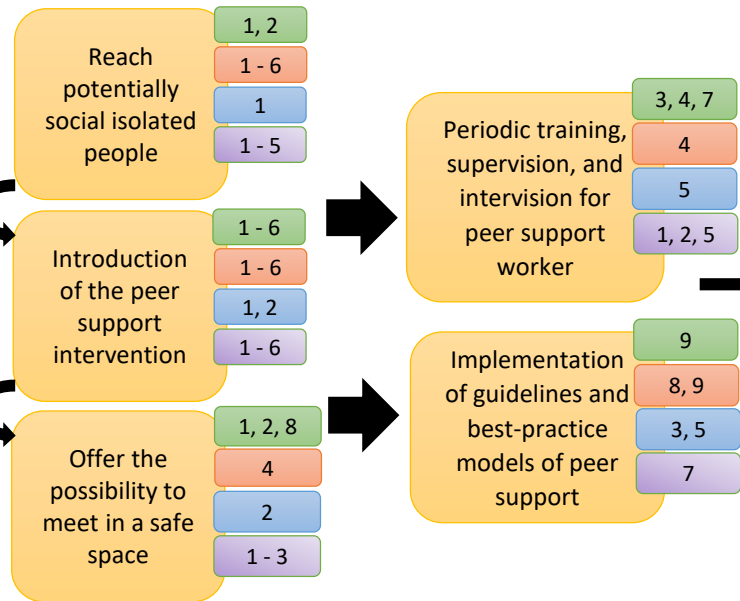

## INCREASE SOCIAL INCLUSION ON DIFFERENT LEVELS:

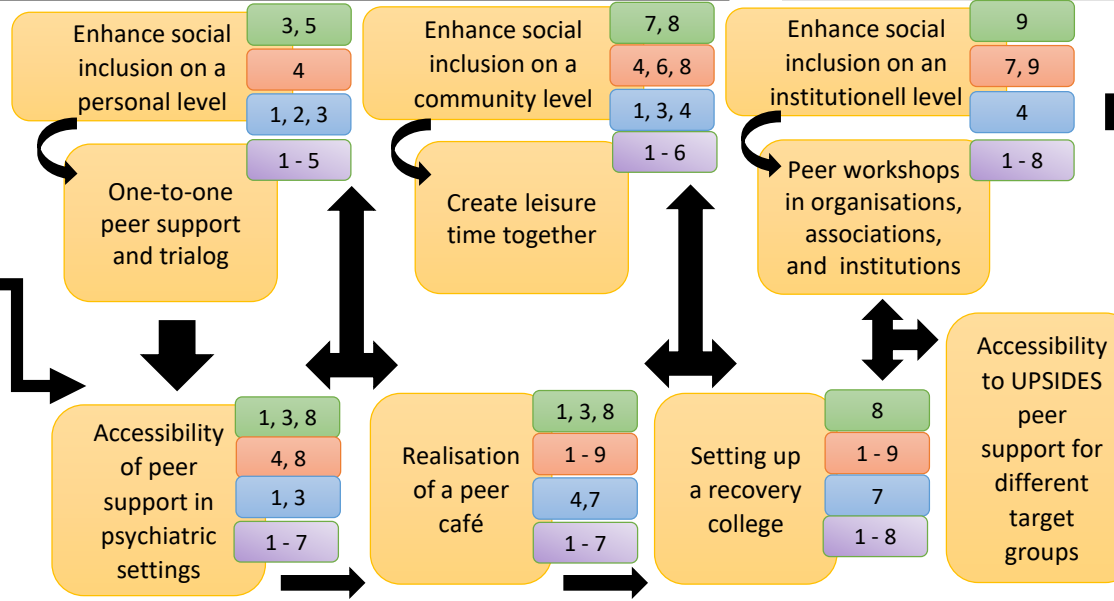

## SUSTAINABILITY OF UPSIDES PEER SUPPORT:

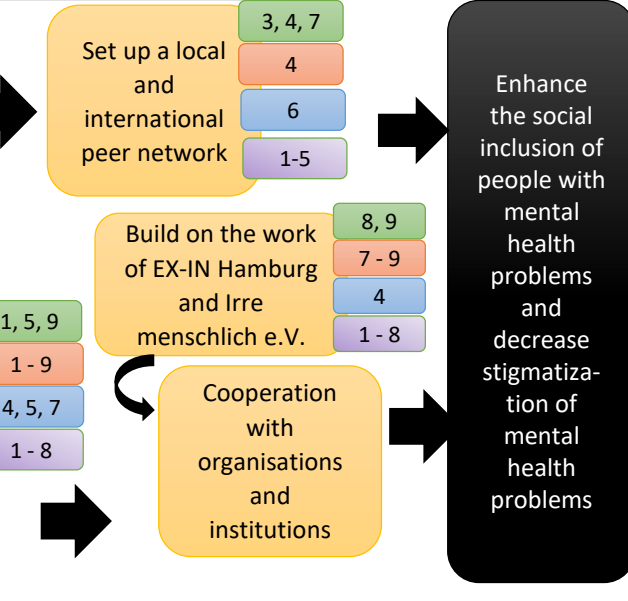

## ToC UKE

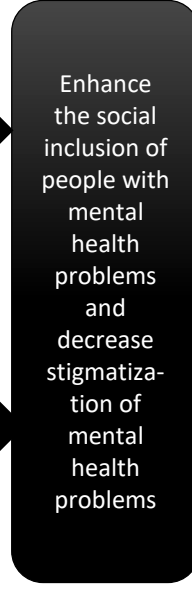

### Interventions

*How can we reach the preassumptions?*

- Promotion of UPSIDES peer support
- Enhance the UPSIDES online and social media performance
- Enlarge the UPSIDES team via peer support worker and train-the-trainer courses
- Additional training for UPSIDES peer-advocates
- Translate all UPSIDES materials to easy-to-understand language
- Realise public relations, media presence and awareness campaigns
- Periodic get-together event for UPSIDES peers
- Periodic public events in various contexts
- More research and peer-led research

### Indicators

*How can we evaluate, if the interventions are succesful?*

- Using differnt statistics
- Record, if the social media accounts are active
- Number of participants
- Assesing the participants feedback
- Record, who is reached and how
- Assess the request for peer support in various settings
- Assess changes in the roles of mental health staff members
- Assess social inclusion
- Assess changes in the attitutes towards mental health problems

### Rationals

*Why do we think, that the interventions will be succesful?*

- The persons are reached, where it is important for them.
- Peer support is a low threshold intervention.
- Peer support has been proved to be effective.
- Peer support in various contexts makes the topic of social exclusion visuable and enables to talk about it.
- Sufficiant request for peer support and peer training in Hamburg.
- Intervision and networking are key factors in the implementation of peer supprt.
- Offers an oppportunity to usual care.

### Assumptions

*Which additional factors have an influence on the interventions?*

- Sufficiant bugjet
- Sufficiant staff
- Premises and rooms
- Data protection regulations
- Sufficiant request
- Interest and cooperation of different stakeholders and organisations
- Political developments
- Social change

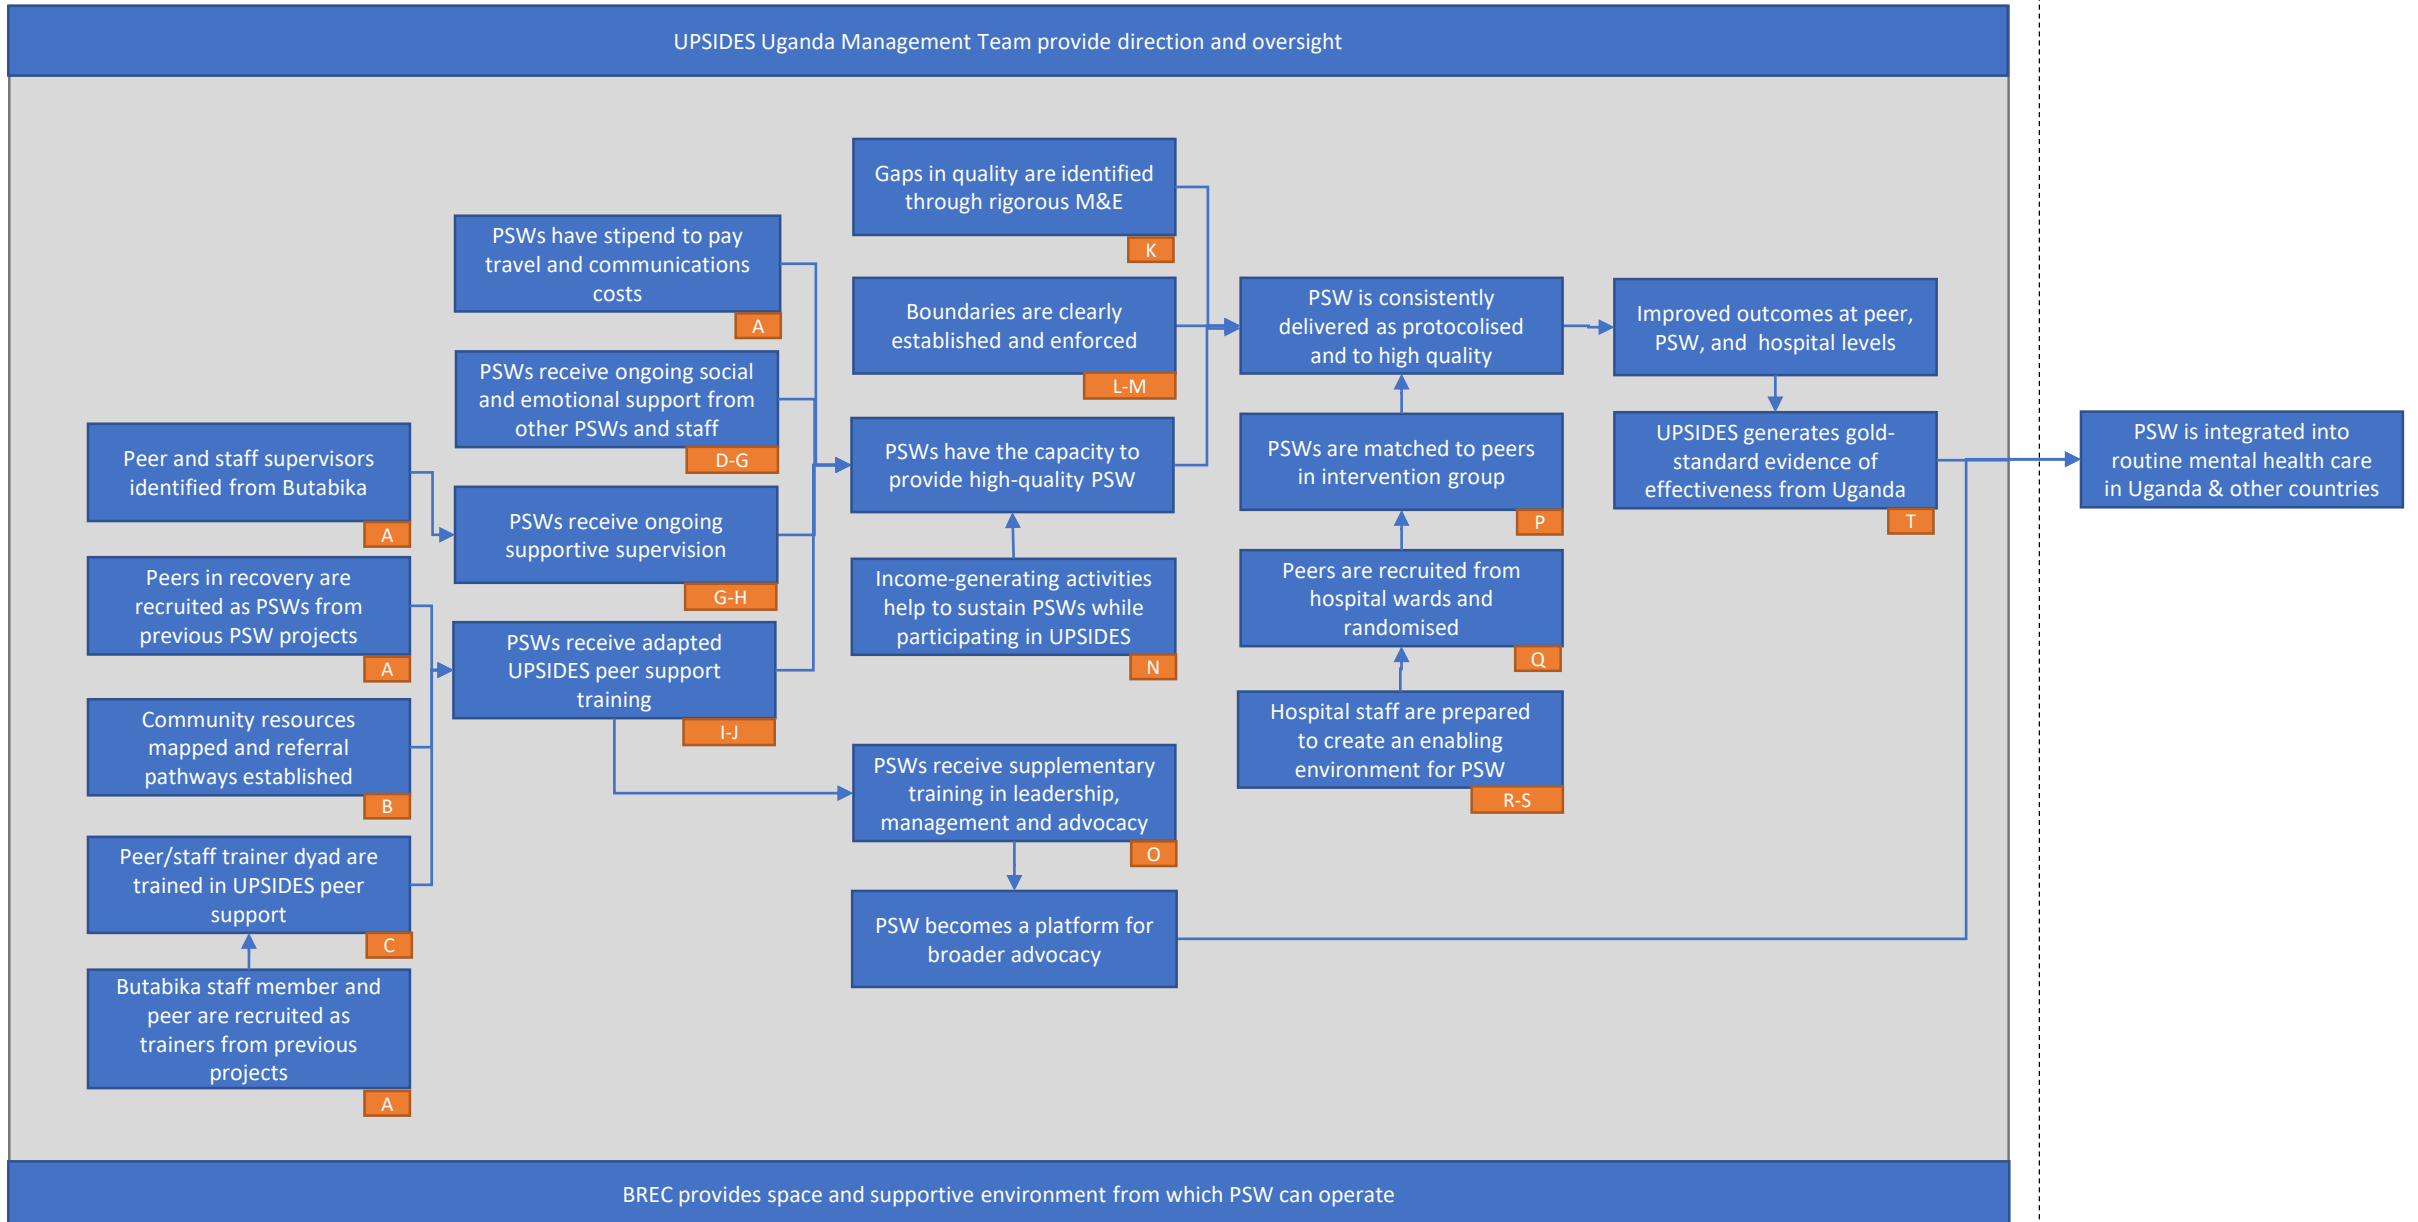

### Interventions/Activities

- A. Define selection criteria, job descriptions and compensation and/or stipends for each role.
- B. Consult LAB members and other stakeholders to identify relevant community resources and contacts, including both secular and non-secular leaders and organisations
- C. Participate in UPSIDES cross-site training in Tanzania
- D. Establish PSW “Buddy” System
- E. Assign “Wellness Officer” from among hospital staff
- F. Organise social and wellness activities (e.g. film club, yoga) in which PSWs can take part
- G. Organise mutual support group meetings for peer-to-peer and group supervision
- H. Organise regular one-to-one supervision and “shadow visits”
- I. Adapt UPSIDES training manual and materials for use in Uganda
- J. Organise training including competency assessment
- K. Establish system for routine monitoring
- L. Establish code of conduct
- M. Train PSWs in MAPA for de-escalation
- N. Establish income-generating activity, e.g. beading
- O. Develop and organise supplementary training
- P. Develop criteria and procedure for “mapping”
- Q. Develop system for recruitment as per study protocol
- R. Carry out organisational readiness workshops
- S. Regularly disseminate UPSIDES newsletter to staff
- T. Evidence is published and disseminated to academic and non-academic audiences, including policy-makers

### TOC Map for UPSIDES, Tanzania

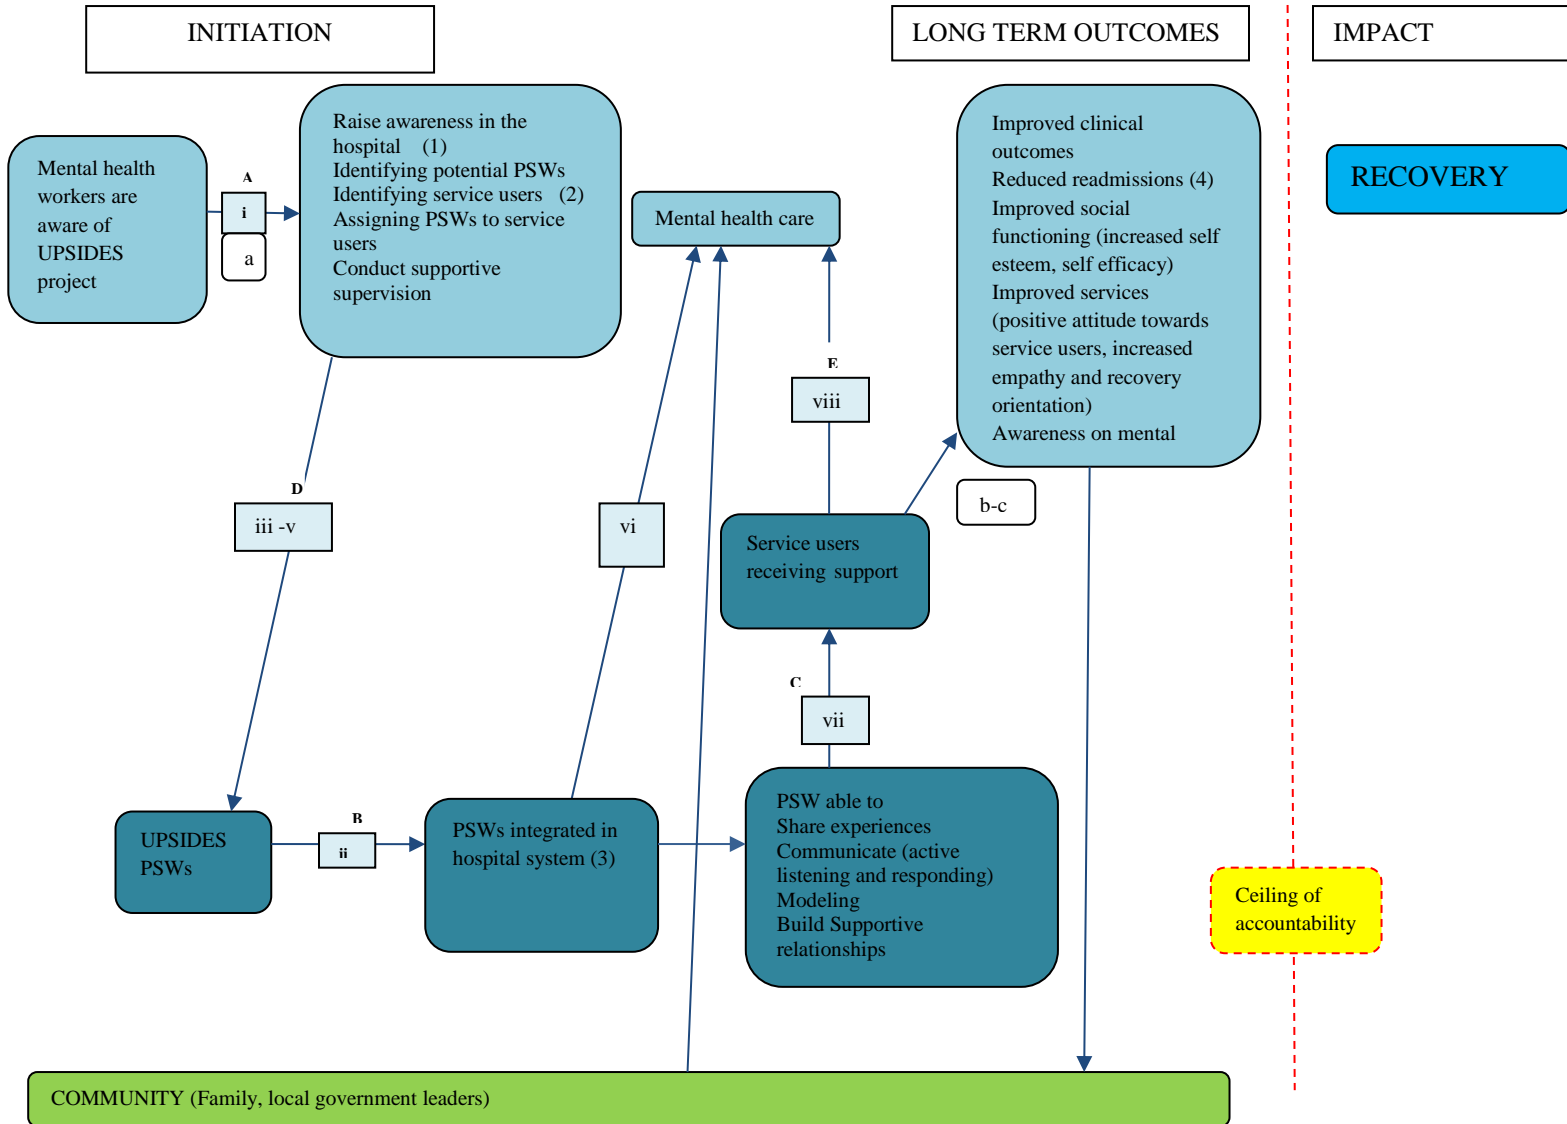

|                                                                                                                                                                       |                                                                                                                                                                                                                                                                                                                                                                                                                       |                                                                                                                                                                                                                                                                                                                                                                                                                                                                                                                                             |
|-----------------------------------------------------------------------------------------------------------------------------------------------------------------------|-----------------------------------------------------------------------------------------------------------------------------------------------------------------------------------------------------------------------------------------------------------------------------------------------------------------------------------------------------------------------------------------------------------------------|---------------------------------------------------------------------------------------------------------------------------------------------------------------------------------------------------------------------------------------------------------------------------------------------------------------------------------------------------------------------------------------------------------------------------------------------------------------------------------------------------------------------------------------------|
| <p><b>Mental health Workers</b></p> <p><b>PSWs</b></p> <p><b>i</b> Intervention</p> <p><b>A</b> -Assumption</p> <p><b>a</b> Rationale</p> <p><b>1-</b> Indicators</p> | <p><b>ASSUMPTIONS</b></p> <p>A. Mental Health Workers are willing to engage with the project and supervise PSWs.</p> <p>B. PSWs with potential qualities consent and undergo training.</p> <p>C. Service users are willing to receive peer support from PSWs</p> <p>D. PSWs continually supervised and helped with challenges.</p> <p>E. Mental health workers are willing and able to accept referrals from PSW.</p> | <p><b>INTERVENTIONS</b></p> <p>i. Conducting organization readiness workshop</p> <p>ii. Training of PSWs</p> <p>iii. Mental health workers screen potential service users and PSWs.</p> <p>iv. Service users are assigned/referred to PSWs</p> <p>v. UPSIDES research team conducts supervision with mental health workers and PSWs.</p> <p>vi. Relapsed PSWs receive specialist care</p> <p>vii. Peers conduct a minimum of 3 visits weekly to each assigned service user.</p> <p>viii. Relapsed service users receive specialist care</p> |
|                                                                                                                                                                       | <p><b>RATIONALE</b></p> <p>a. Health care providers should be aware of the project so as to assist PSWs.</p> <p>b. Research shows that PSWs are better at reducing inpatient services and improve relationships with health care provider's engagement with care and variety of recovery outcomes.</p> <p>c. Mentally ill patients are seen treated and return to their social functions.</p>                         | <p><b>INDICATORS</b></p> <p>1. Mental health workers at Muhimbili National Hospital are aware of the project.</p> <p>2. Mental health workers have competencies to screen service users.</p> <p>3. PSWs have appropriate skills to support service users after the training.</p> <p>4. Reduced CMD symptoms and number of admissions</p>                                                                                                                                                                                                    |

# Theory of change in order to develop, evaluate and implement the peer support work intervention in mental health service in

ToC BGU

Israel

Participatory approach by bringing together a range of stakeholders

Identifying PSW developmental needs

FG 1+2: **14 stakeholders** - PSW's, multidisciplinary MH directors, practitioners which employ PSW in Israel. *Over the past decade, diverse peer roles were developed in Israeli mental health system. Participants related to Lack of clear job definitions for PSW's role in Israel; Uncertainty about peer providers' occupational identity. Staff and PSW were unsure when and how much peers should share their lived-experience. Participants pointed to a combination of unique-peer and professional skills which are desired for peer provider.*

Identifying organizational criteria for optimal implementation of PSW

FG 1+2: **14 stakeholders** -Preliminary analyses shed light on challenges to the sustainable implementation of peer support in MH services: *Participants emphasized that multi-level conditions are needed in order to ensure fulfillment of peer provider roles. Peer support begins 'top-down': A need for policy support and organizational readiness. Peer support continues 'bottom-up': A need for peer providers' and service users' readiness for change.*

Deep Interviews with stakeholders and local advisory emphasized the need to further support the occupational development and career track of peer support workers by **striving for a deeper understanding of the concept of peer roles, developing training and supervision** whilst keeping to a shared learning, building mutuality, and shared meaning making framework.

Developing proper UPSIDES Manual training and supervision

FG3: All the participants were local stakeholders with experience of either: employing peer support workers; working as peer support workers ; peer trainers; service users. The participants mentioned and described additional modules recommended to be developed in the manual training and changes need to be **made and cultural adaptation.**

**Piloting phase:** Developing a TOC must be a continual process of reflection and adaptation as barriers to implementation arise and new evidence comes to light, requiring pathways to be changed and strengthened.

This was an important learning for us, to see the value in developing the UPSIDES **intervention into a small-group intervention – as an add** on that will occur with new peer-clients that peer support workers have not been working with before. This will make it easier to use their live experience more explicitly with them.

Organizational readiness

We find that **organizational readiness** needs to be denser already **at early stages of implementation.** Therefore, before the second training has started, we conducted 4 meetings to introduce the project and PSW with directors and team members .

Second UPSIDES training

We considered diverse questions, e.g:- how many PSW need to be trained in order to deliver the intervention as intended, a special attention was given to the **ripeness of the person** to use their lived experience, their **intrinsic motivation** for this role and the **set conditions** for them to successfully complete training.

Professional PSW working permanently in services

An evaluation based on TOC will require a number of different methods to capture all of the indicators- **RCT and qualitative sub study**

Successful and sustainable peer support intervention

Description of the intervention which can be disseminated to a variety of audiences, providing information on the components of the intervention that need to be adapted for use in other settings. 2 FG should be conducted on 22/12/2019 with Participants with **relevant organizational knowledge regarding the implementation of UPSIDES peer support**

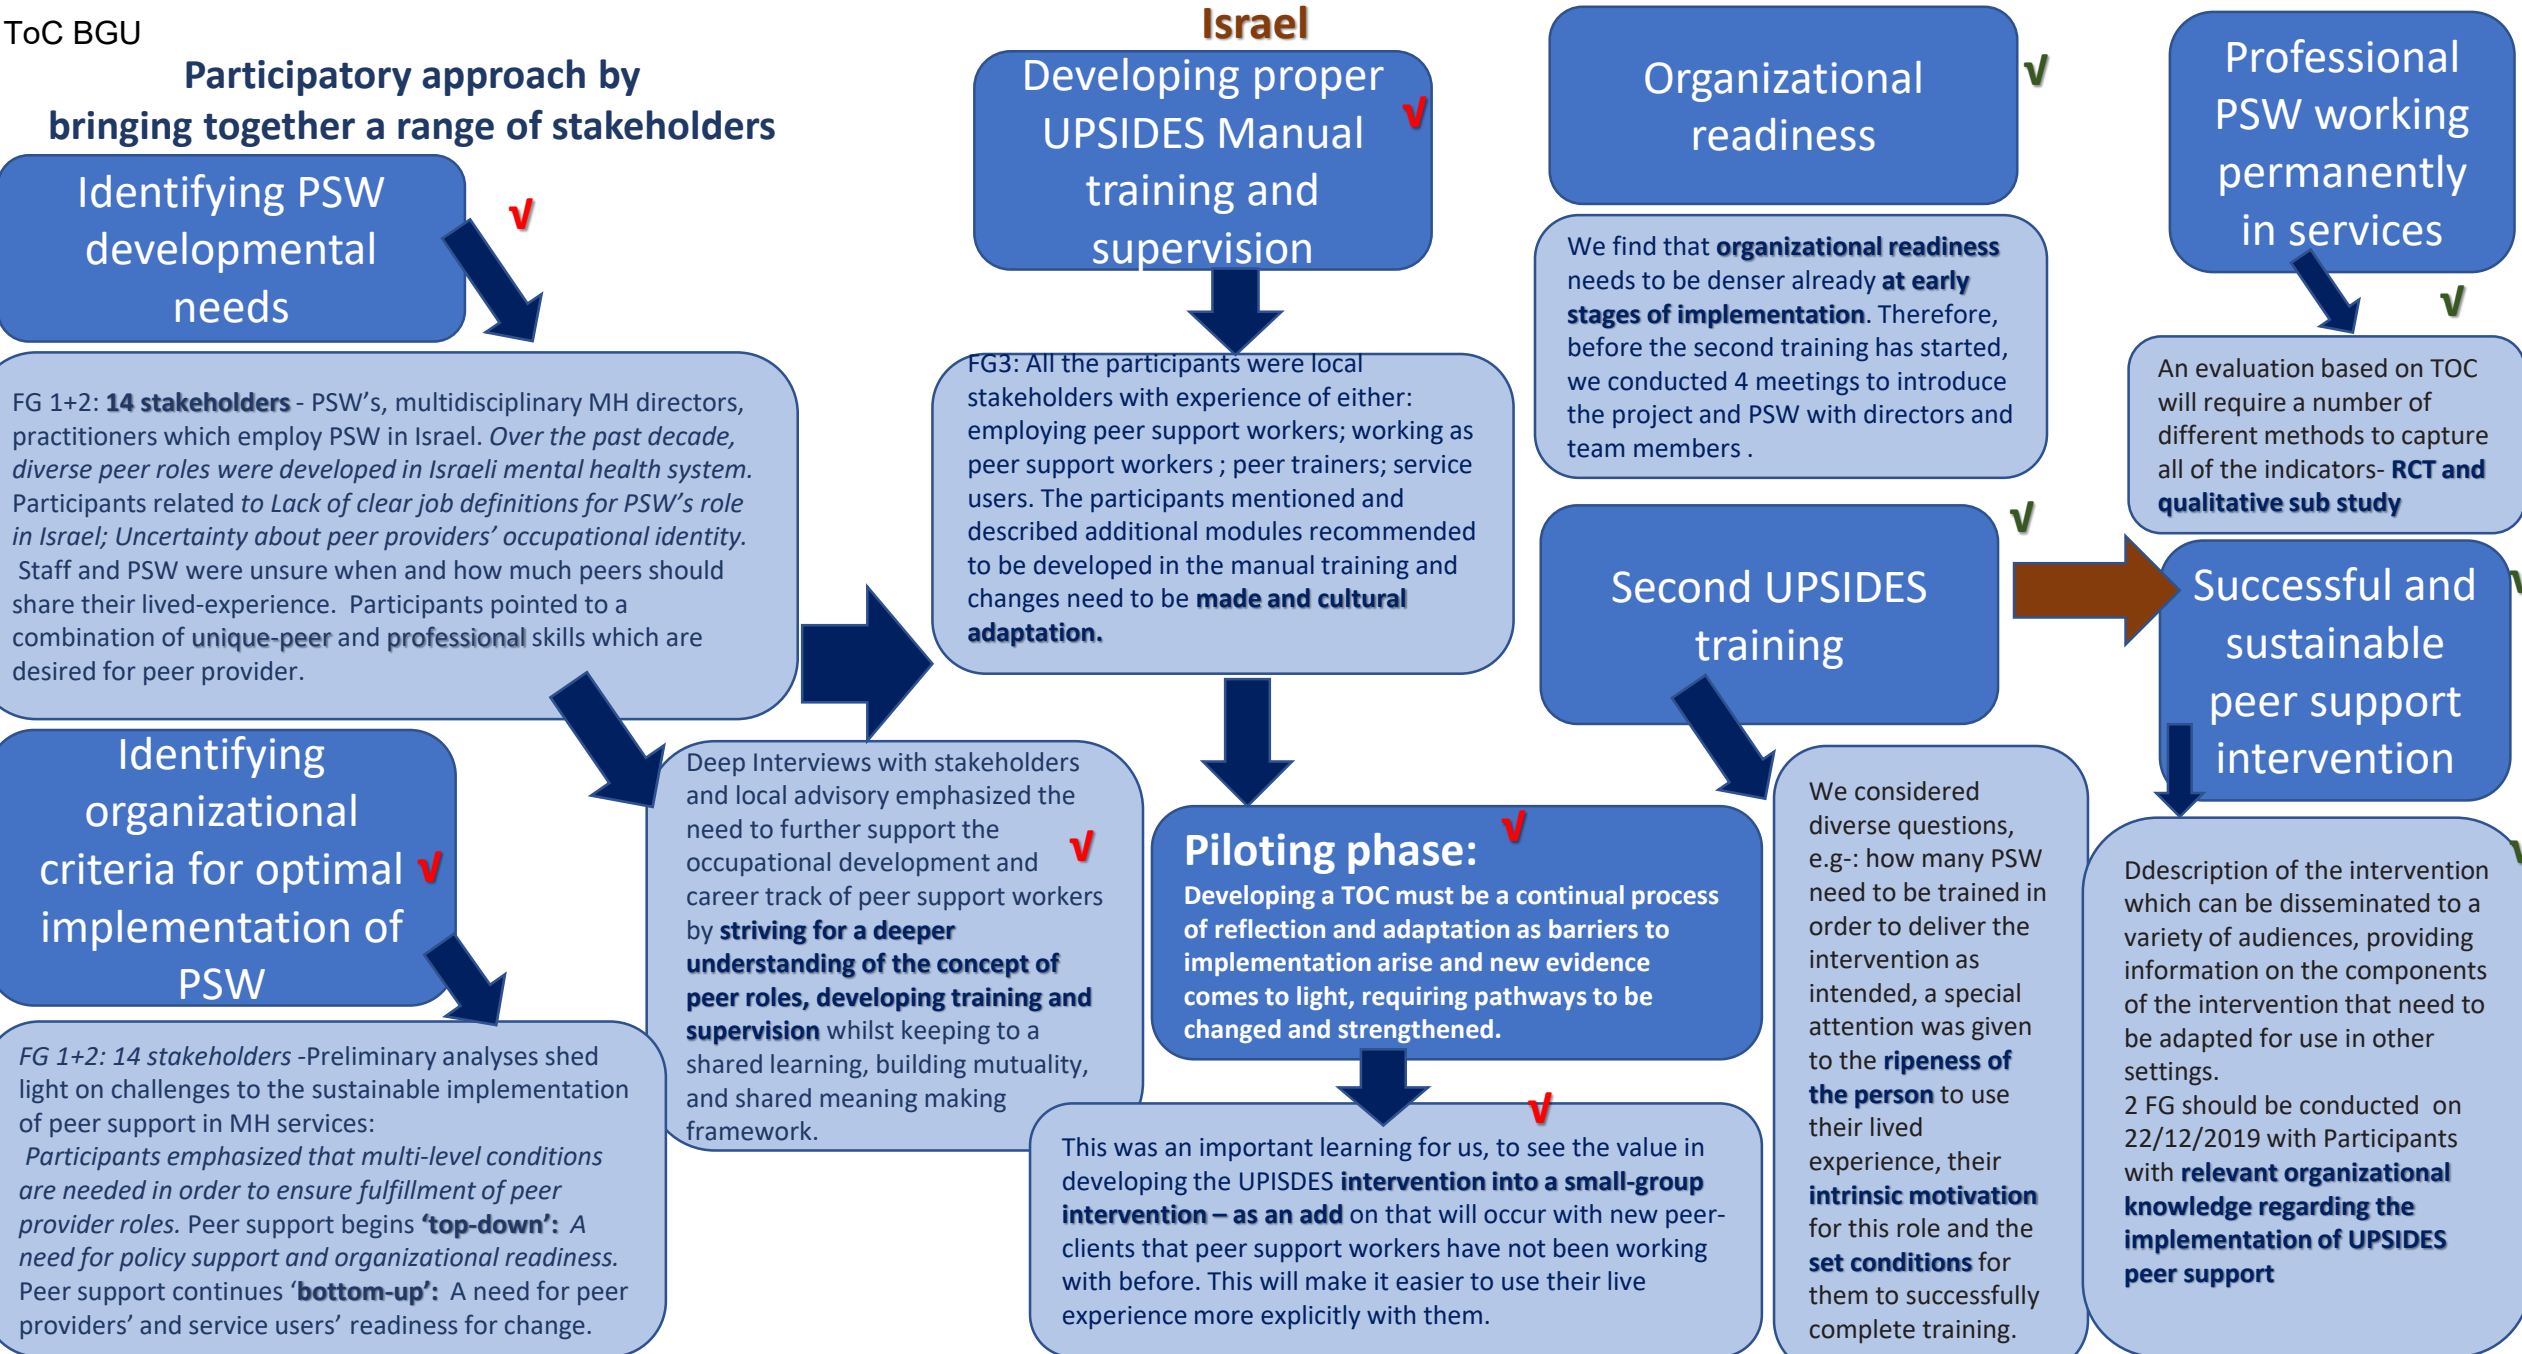



# THEORY OF CHANGE

## OUTCOMES

Social inclusion

Empowerment

emotionally      Financially

## INTERVENTIONS

Stakeholders

- \* Hospital
- \* NGOs
- \* Govt. agencies  
(ex. employment agency)

Activities

- \* PSV training
- \* Develop vocational skills.

## INDICATORS

PSVs getting into the community.

## RATIONALE

- \* Social Inclusion
- \* To reduce stigma
- \* To fight stigma
- \* More involvement
- \* Employment.

## ASSUMPTION

- \* Support from all stakeholders
- \* Readiness of PSVs to go back into the community
- \* Community accepting persons with SMD.
